# Supplementary material for: Antibiotic Resistance and Pathogenomics of Staphylococci Circulating in Novosibirsk, Russia
Source: MDPI journal article supplement (doi:10.3390/microorganisms9122487), 2021-11-30
Supplement: s1 [file s1]

**Table S1.** Primers, specific to antibiotic resistance encoding genes

| Gene                          | Primer | Sequence                                                |
|-------------------------------|--------|---------------------------------------------------------|
| <i>blaZ</i>                   | blaZ   | 5'-(HEX)-AGTCTTGCCGAAAGCAGCAGGCGTTGAAGT-(BHQ1)-3'       |
|                               | Fbz    | 5'-TGGGAGATAAAGTAACAAATCCAGT-3'                         |
|                               | Rbz    | 5'-GCTTAATTTTCCATTTGCGATAAGT-3'                         |
| <i>mecA</i>                   | Zmec   | 5'-(HEX)-GCTCCAACATGAAGATGGCTATCGTGTGACAATCGT-(BHQ1)-3' |
|                               | Fmec   | 5'-AGGGACTCGAAAACTTTACGAT-3'                            |
|                               | Rmec   | 5'-ATTAATGTATGTGCGATTGTATTGC-3'                         |
| <i>ermA</i>                   | ErmA   | 5'-(HEX)-TCATCCTAAGCCAAGTGTAGACTCTGT-(BHQ1)-3'          |
|                               | Rera   | 5'-TTGATGTGCGTTCAAGAACAATCA-3'                          |
|                               | Fera   | 5'-GCTCAAAAAAGTACCACCACT-3'                             |
| <i>ermC</i>                   | ermC   | 5'-(HEX)-AGAGGTGTAATTTTCGTAAGTCCATTGAAATAGACC-(BHQ1)-3' |
|                               | Ferc   | 5'-GGGCATTTTACCCTTGAATTAGT-3'                           |
|                               | Rerc   | 5'-ACAAGTTTATTTTCTGTAGTCTTGCA-3'                        |
| <i>msrA</i>                   | msrA   | 5'-(HEX)-ACCTACACCATTTGCACCTACGAGCGCT-(BHQ1)-3'         |
|                               | Fmsr   | 5'-CTGCTAACACAAGTACGATTCC-3'                            |
|                               | Rmsr   | 5'-TCAATCCCTCTATTTGGTGGT-3'                             |
| <i>aph(3')-IIIa</i>           | aph3   | 5'-(HEX)-CGAGCTGTATGCGGAGTGCATCAGGCTCT-(BHQ1)-3'        |
|                               | Fap3   | 5'-AGGGACAATCCGATATGTCG-3'                              |
|                               | Rap3   | 5'-TGAAGATGAACAAAGCCCTGA-3'                             |
| <i>ant(4')-Ia</i>             | adD    | 5'-(HEX)-TGGCTCTCTTGGTCGTCAGACTGATGGGC-(BHQ1)-3'        |
|                               | FdD    | 5'-GGATGATGTTAAGGCTATTGGTG-3'                           |
|                               | RdD    | 5'-CACATCATCTCAATATCCGAATAGG-3'                         |
| <i>aac(6')-Ie-aph(2'')-Ia</i> | zBif   | 5'-(HEX)-AGATTTGCCAGAACATGAATTACACGAGGGCA-(BHQ1)-3'     |
|                               | FBif   | 5'-AAGGGCATACCAAAAAATCTG-3'                             |
|                               | RBif   | 5'-CCTTAACATTTGTGGCATTATCAT-3'                          |
